# Supplementary material
Source: PubMed Central journal article supplement (PMC4873365)
Supplement: NIHMS778400-supplement-1.pdf [file NIHMS778400-supplement-1.pdf]

## Supplementary Figures:

### Figure S1:

#### Genotyping of *Rassf1a* and *Sav1* mutant mice.

A. *Rassf1a* knockout mice lack exon 1 of the *Rassf1* gene. A diagram and typical PCR genotyping of wildtype and *Rassf1a*<sup>-/-</sup> mice is shown.

B. *Sav1* knockout mice lack exons 1 and 2 of the *Sav1* gene. A diagram and typical PCR genotyping of wildtype and *Sav1*<sup>+/-</sup> mice is shown.

### Figure S2:

#### Liver from a *Sav1*<sup>+/+</sup> *Rassf1a*<sup>-/-</sup> mouse.

The image shows a typical hepatocellular carcinoma with characteristic trabecular growth pattern. H&E.

### Figure S3:

#### Liver from a *Sav1*<sup>+/-</sup> *Rassf1a*<sup>-/-</sup> mouse.

The image shows hyperplasia of oval cells around a vein thought to be a central vein (c). These cells are sometimes arranged to form small, duct-like structures (arrows). H&E.

### Figure S4:

#### Liver size and weight of gene-targeted mice.

A. Representative photographs of livers of 6 month-old mice of the different genotypes. a, *Rassf1a*<sup>+/+</sup> *Sav1*<sup>+/+</sup>, b, *Rassf1a*<sup>-/-</sup> *Sav1*<sup>+/+</sup>, c, *Rassf1a*<sup>+/+</sup> *Sav1*<sup>+/-</sup>, and d, *Rassf1a*<sup>-/-</sup> *Sav1*<sup>+/-</sup> mice.

B. Liver to body weight ratios are shown as bar graphs (+/- S.D.). We analyzed four livers of each genotype at six months of age.

**Figure S5:****Gene ontology analysis of differentially expressed genes using the DAVID tool.**

- A. Genes differentially expressed in *Rassf1a*<sup>-/-</sup> *Sav1*<sup>+/+</sup> mice relative to wildtype mice.
- B. Genes differentially expressed in *Rassf1a*<sup>-/-</sup> *Sav1*<sup>+/-</sup> mice relative to wildtype mice.

**Figure S6:****DNA methylation analysis of the *RASSF1A* and *SAV1* genes in human liver cancer specimens.**

- A. *RASSF1A* promoter. DNA from human liver cancer samples and adjacent normal tissue was treated with sodium bisulfite. The target gene promoter CpG island was amplified by PCR and the PCR products were digested with BstUI, which cleaves only unconverted, methylated DNA at 5'CGCG sequences. Cleavage indicates methylation. The samples 20y M, 83y F, and 53y M were DNAs from male and female liver samples of individuals without liver tumor. The positive control is an in vitro methylated DNA sample.
- B. *SAV1* promoter. The sequences were cleaved with TaqI, which cleaves only methylated DNA at 5'TCGA sequences.

**Figure S7:****DNA methylation analysis of the *Mst1* and *Mst2* genes in human liver cancer specimens.**

The DNA methylation status was analyzed by COBRA assays. BstUI was used as the cleavage enzyme to indicate methylation at 5'CGCG sequences in the promoter CpG islands of the *MST1* and *MST2* genes.

- A. *MST1* promoter.
- B. *MST2* promoter.

**Figure S8:****Methylation and expression of *MST1* and *MST2* in human HCC.**

The data were extracted from TCGA data portal (<http://cancergenome.nih.gov/>). Expression (RNA-seq) and DNA methylation (Illumina 450k array) data were displayed for individual specimens (each column). The methylation data are plotted for individual CpG sites along the locus (each row). White bars show samples lacking expression data. The positions of the promoter-associated CpG islands are indicated by vertical bars. **A.** *MST1* locus. **B.** *MST2/STK3* locus.

**A**

**Rassf1a**

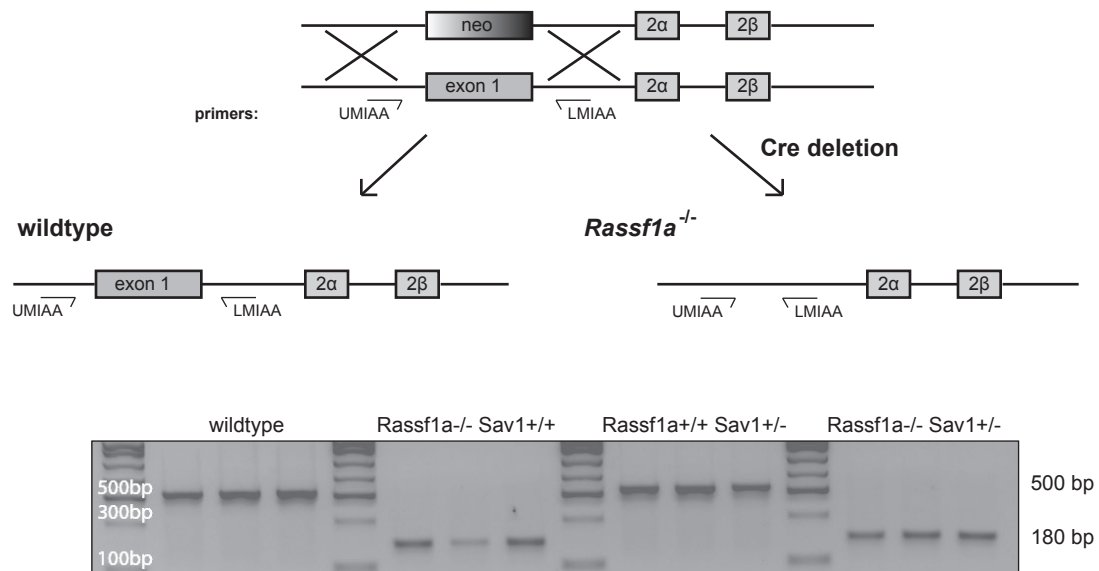

**B**

**Sav1**

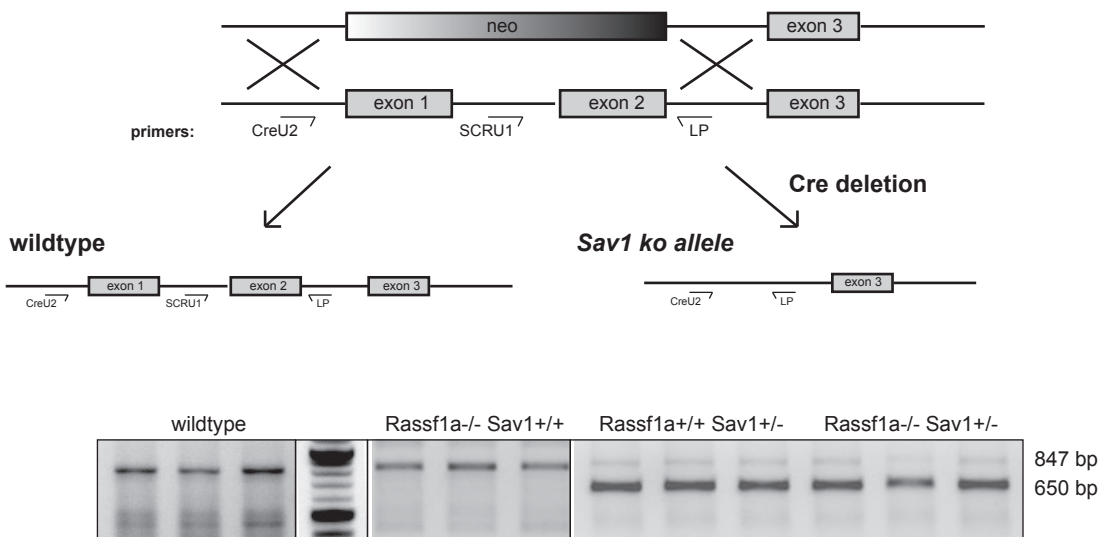

Rassf1a primers:

UMIAA: 5' TTG TGC CGT GCC CCG CCC A 3'

LMIAA: 5' TGA CCA GCC CTC CAC TGC CGC 3' locates at intron 1

PCR products: wt 500 bp; knockout 180 bp.

Sav1 primers:

LP: 5'-ACT ACC AGC AAG CAG GAG GA-3' locates at intron 2

SCR1: 5'-CAA TAT GCA GCA TCC ATT CG-3' locates at intron 1

CreU2: 5'-CTC TGG TGC TCAAAG GCT TC-3' locates outside of exon 1

PCR products: wt 847 bp; knockout 650 bp.

**Figure S1**

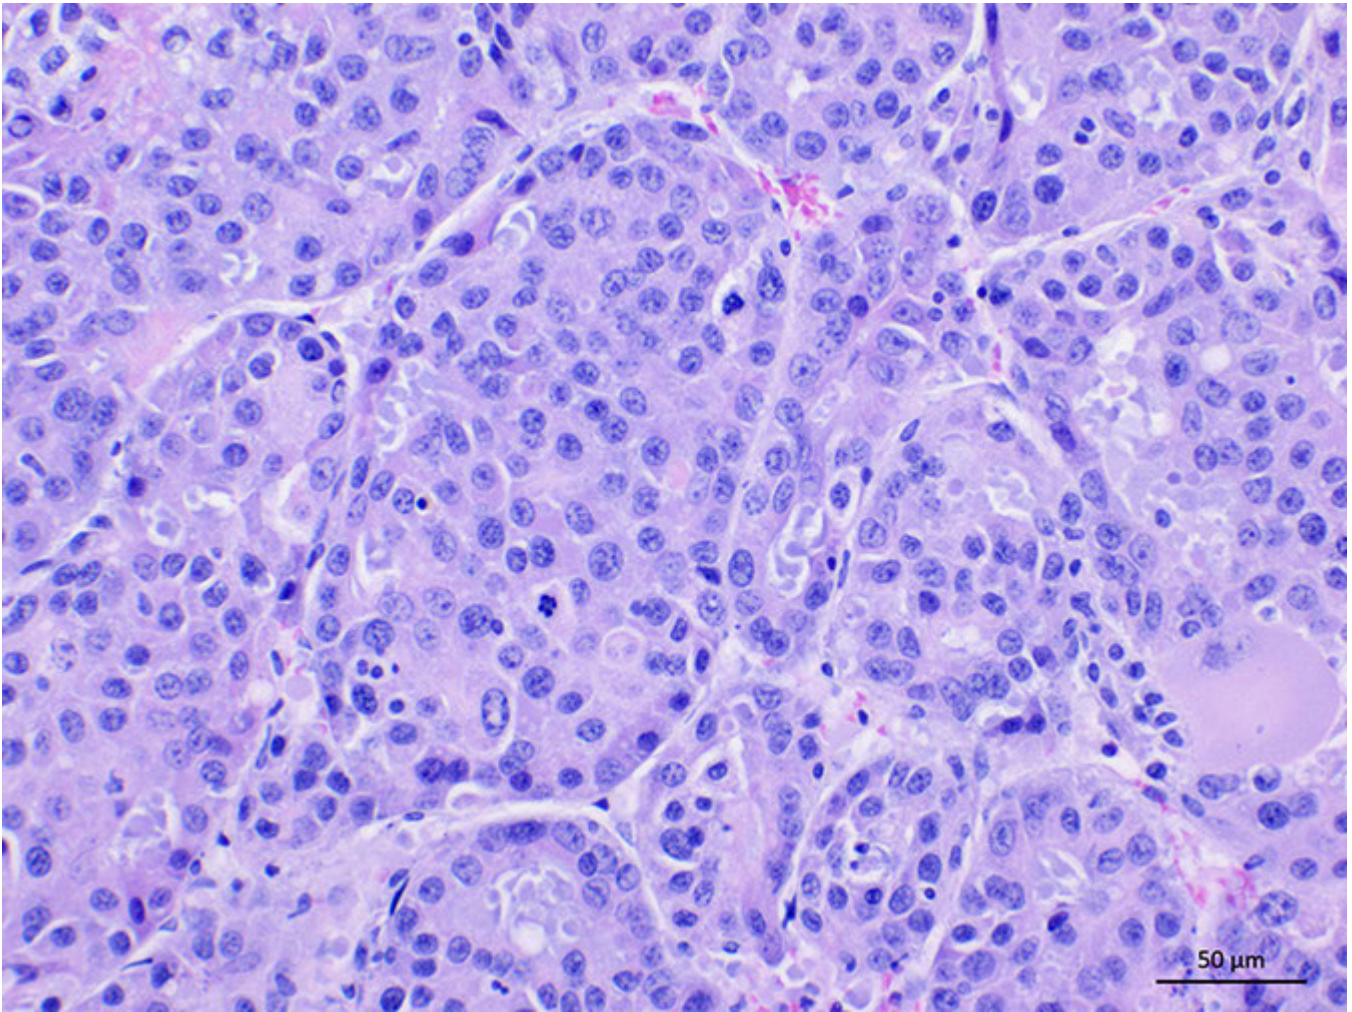

Figure S2



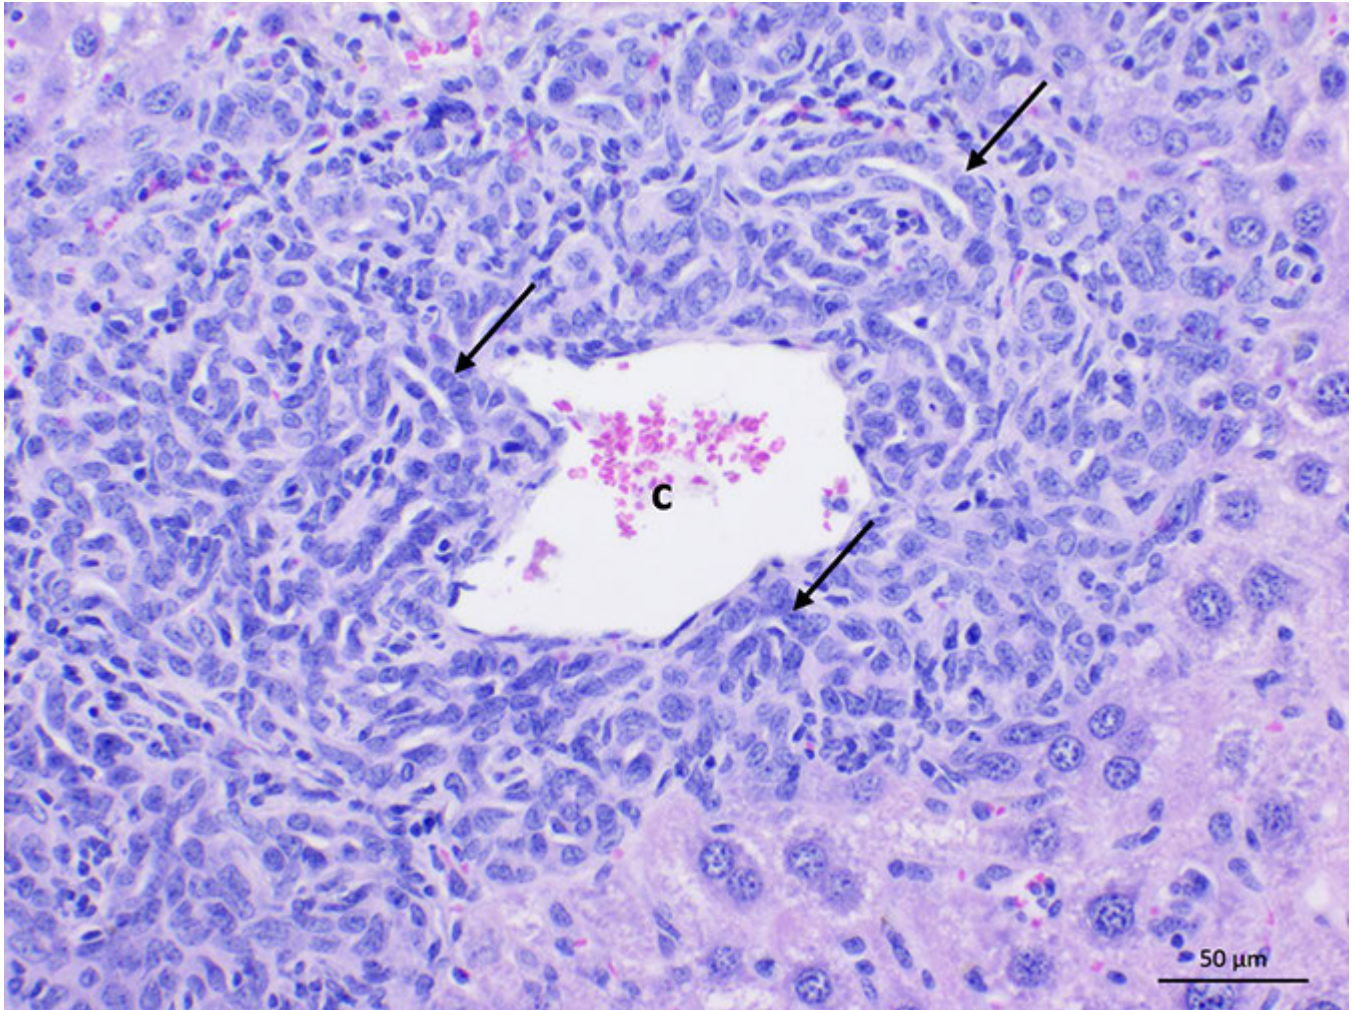

Figure S3

**A**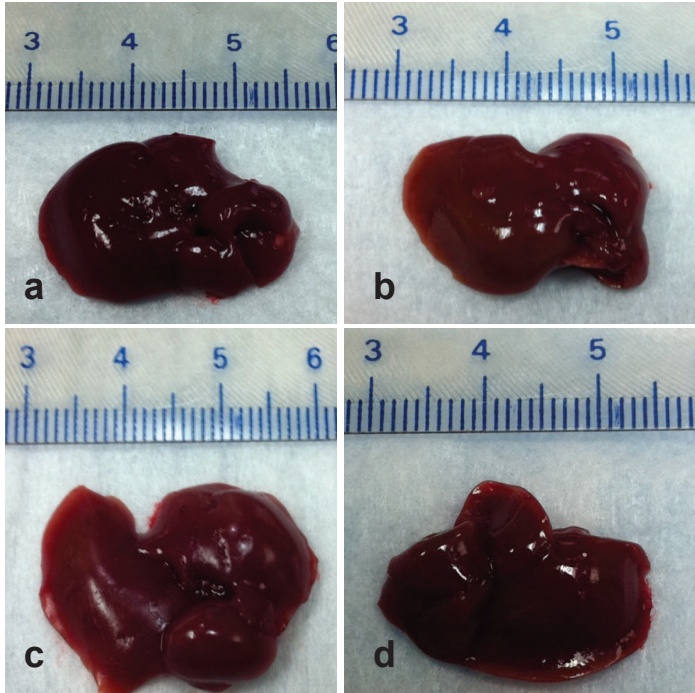**B**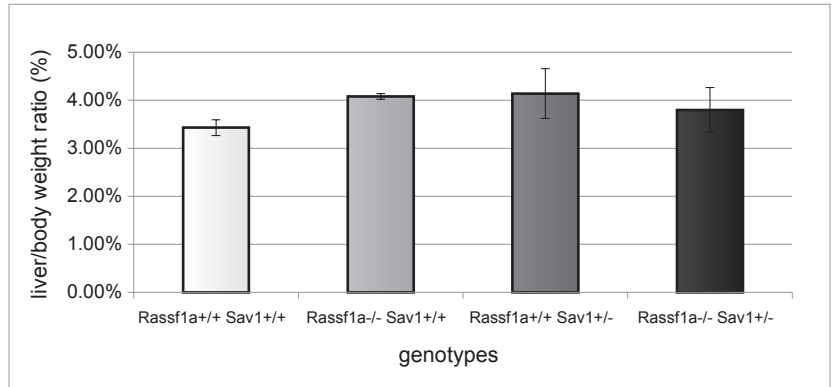**Figure S4**

A

upregulated

| Category | Term                                                  | RT | Genes | Count | %   | P-Value | Benjamini |
|----------|-------------------------------------------------------|----|-------|-------|-----|---------|-----------|
| INTERPRO | <a href="#">Beta tubulin</a>                          | RT |       | 4     | 3.1 | 1.4E-5  | 4.1E-3    |
| INTERPRO | <a href="#">Tubulin/FtsZ, 2-layer sandwich domain</a> | RT |       | 4     | 3.1 | 2.3E-4  | 3.3E-2    |
| INTERPRO | <a href="#">Tubulin</a>                               | RT |       | 4     | 3.1 | 2.7E-4  | 2.6E-2    |
| INTERPRO | <a href="#">Tubulin/FtsZ, GTPase domain</a>           | RT |       | 4     | 3.1 | 2.7E-4  | 2.6E-2    |

| Category     | Term                             | RT | Genes | Count | %   | P-Value | Benjamini |
|--------------|----------------------------------|----|-------|-------|-----|---------|-----------|
| KEGG_PATHWAY | <a href="#">Circadian rhythm</a> | RT |       | 4     | 3.1 | 1.4E-4  | 9.0E-3    |

downregulated

| Category     | Term                             | RT | Genes | Count | %   | P-Value | Benjamini |
|--------------|----------------------------------|----|-------|-------|-----|---------|-----------|
| KEGG_PATHWAY | <a href="#">Circadian rhythm</a> | RT |       | 4     | 4.2 | 2.9E-5  | 9.8E-4    |

B

upregulated

| Category | Term                                                  | RT | Genes | Count | %   | P-Value | Benjamini |
|----------|-------------------------------------------------------|----|-------|-------|-----|---------|-----------|
| INTERPRO | <a href="#">Beta tubulin</a>                          | RT |       | 4     | 0.2 | 1.3E-5  | 3.6E-3    |
| INTERPRO | <a href="#">Tubulin/FtsZ, 2-layer sandwich domain</a> | RT |       | 4     | 0.2 | 2.1E-4  | 2.9E-2    |
| INTERPRO | <a href="#">Tubulin</a>                               | RT |       | 4     | 0.2 | 2.4E-4  | 2.3E-2    |
| INTERPRO | <a href="#">Tubulin/FtsZ, GTPase domain</a>           | RT |       | 4     | 0.2 | 2.4E-4  | 2.3E-2    |

| Category     | Term                             | RT | Genes | Count | %   | P-Value | Benjamini |
|--------------|----------------------------------|----|-------|-------|-----|---------|-----------|
| KEGG_PATHWAY | <a href="#">Circadian rhythm</a> | RT |       | 4     | 0.2 | 1.3E-4  | 7.7E-3    |

downregulated

| Category     | Term                             | RT | Genes | Count | %   | P-Value | Benjamini |
|--------------|----------------------------------|----|-------|-------|-----|---------|-----------|
| KEGG_PATHWAY | <a href="#">Circadian rhythm</a> | RT |       | 4     | 2.3 | 1.6E-4  | 9.9E-3    |

Figure S5





A

*MST1*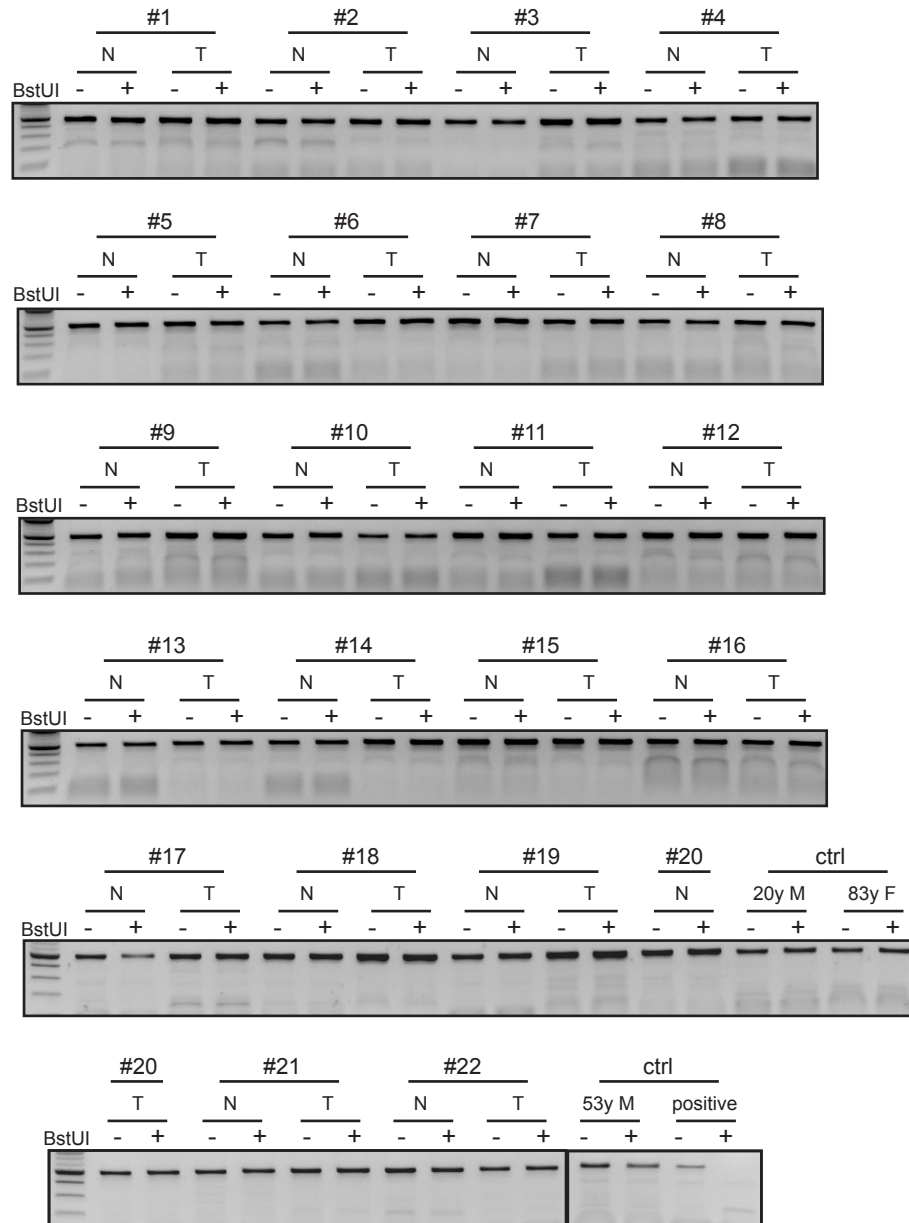

B

*MST2*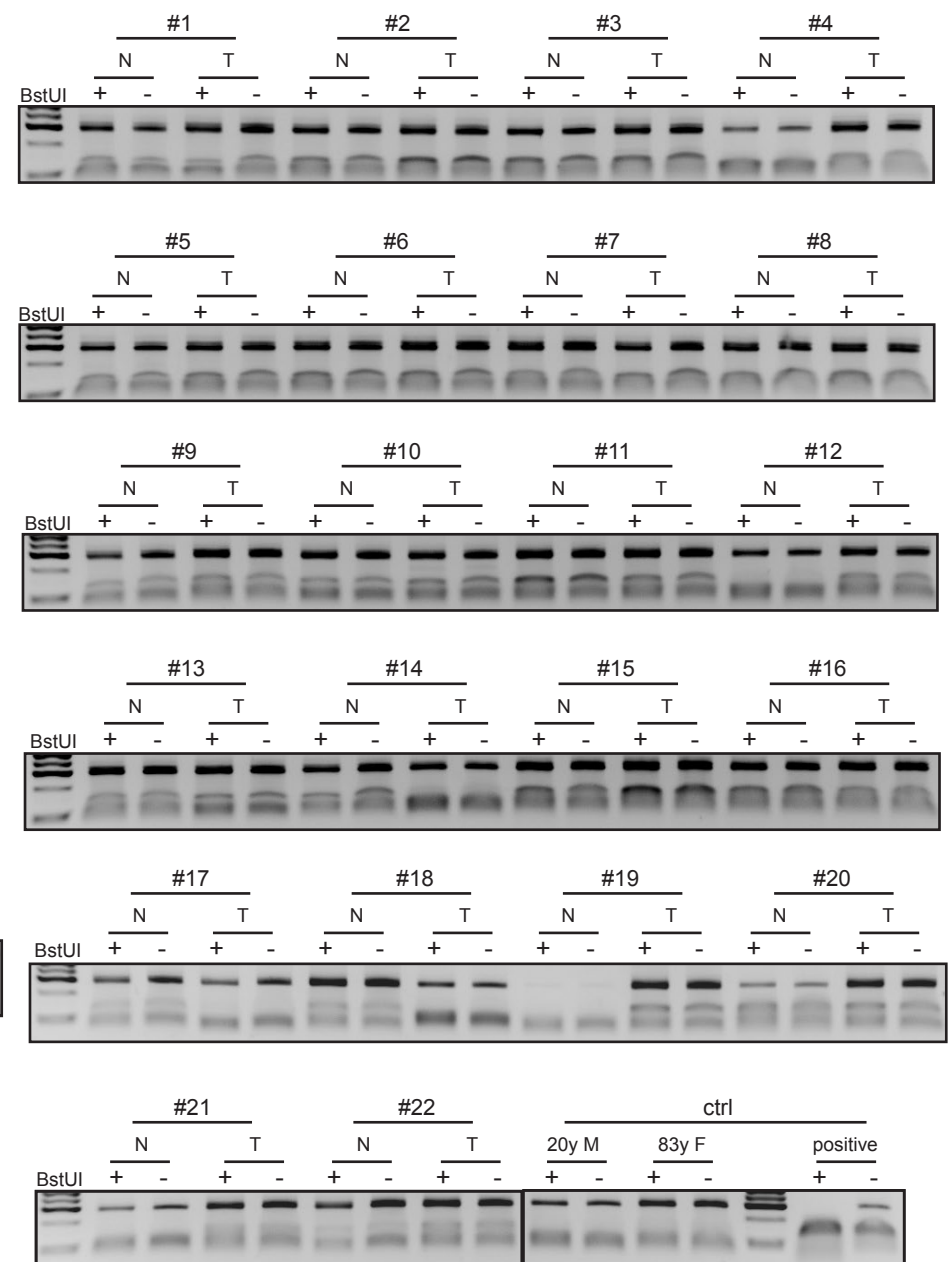

Figure S7

A

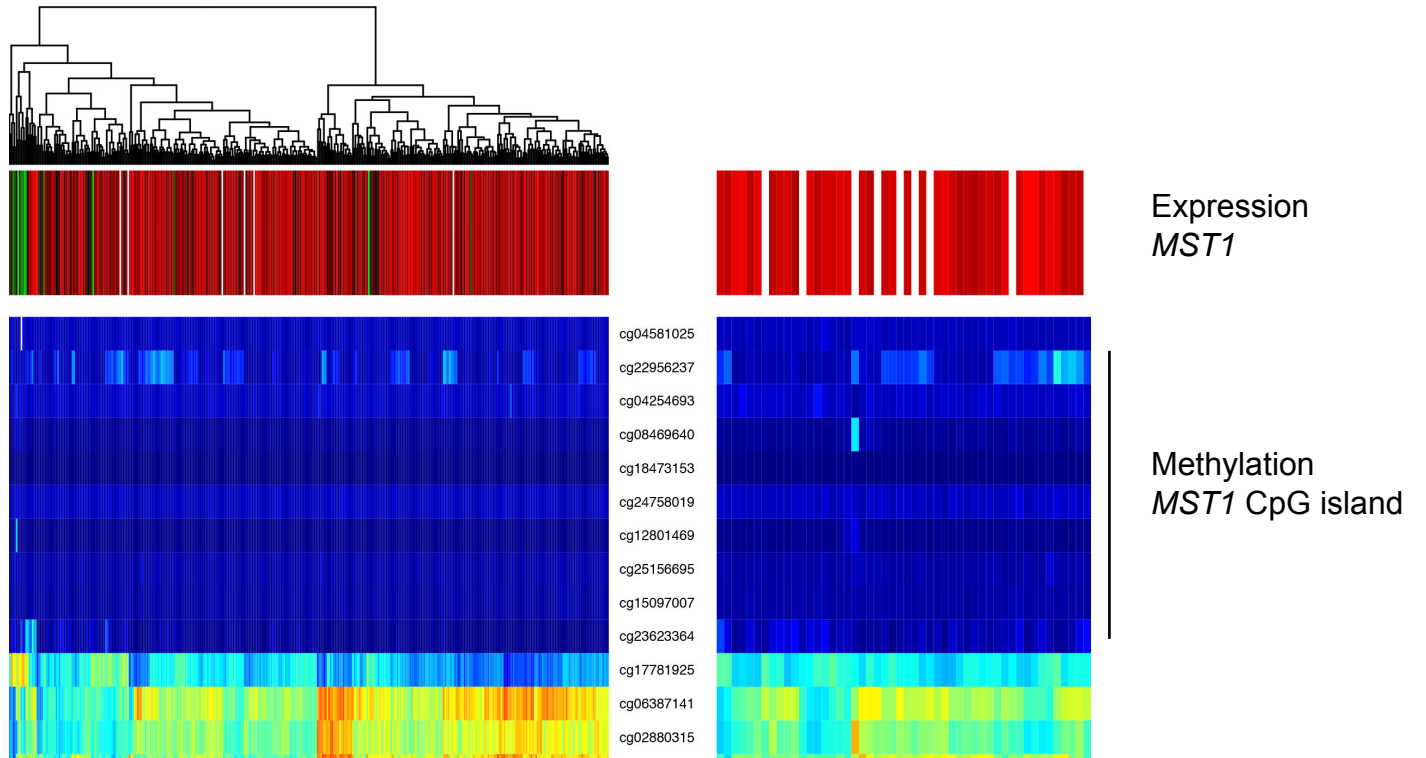

B

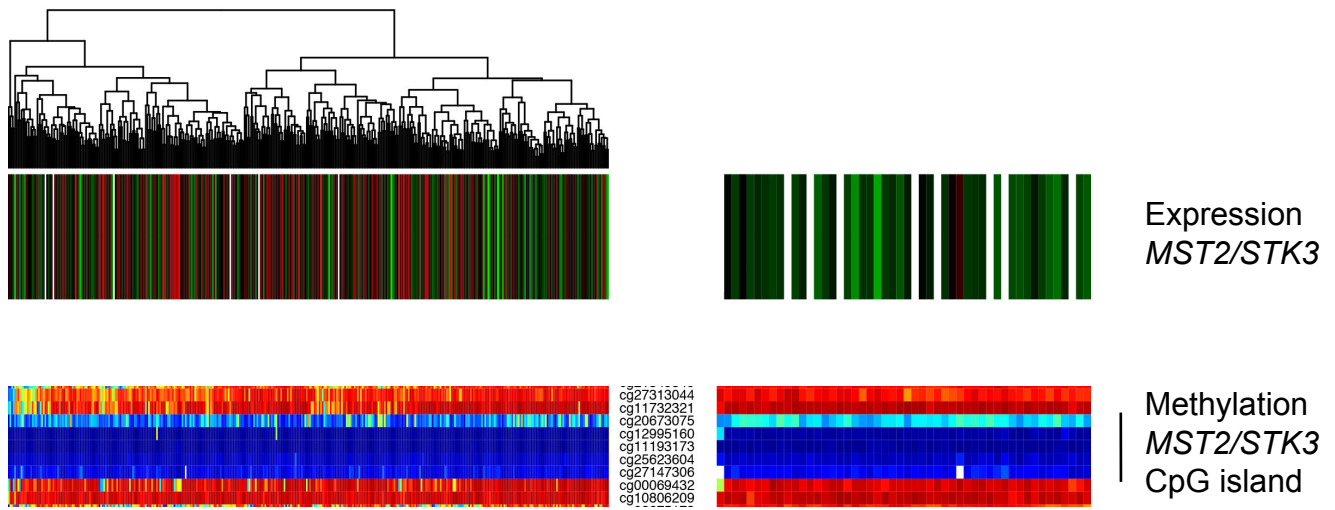

Tumor (n=377)

Normal (n=50)

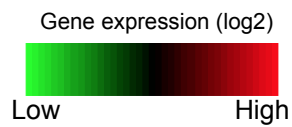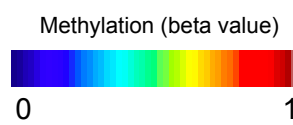

Figure S8
