# Supplementary material
Source: PubMed Central journal article supplement (PMC4873365)
Supplement: NIHMS778400-supplement-4.pdf [file NIHMS778400-supplement-4.pdf]

**Table S3: Human liver cancer sample information**

| #  | diagnosis                           |
|----|-------------------------------------|
| 1  | HCC, T2NXMX, inflammation           |
| 2  | HCC, T2NCMC, cirrhosis, hepatitis C |
| 3  | HCC, T4N0MX                         |
| 4  | HCC, T3NXMX, cirrhosis              |
| 5  | HCC, T1NXMX                         |
| 6  | HCC, CC                             |
| 7  | HCC, pT1NX, cirrhosis, hepatitis    |
| 8  | HCC, inflammation                   |
| 9  | HCC, pT3NX, inflammation            |
| 10 | CC                                  |
| 11 | HCC, cirrhosis                      |
| 12 | CC                                  |
| 13 | HCC, pT1NX                          |
| 14 | HCC, pNX                            |
| 15 | HCC                                 |
| 16 | HCC                                 |
| 17 | HCC, cirrhosis, inflammation        |
| 18 | HCC, necrotic sarcoma, cirrhosis    |
| 19 | HCC                                 |
| 20 | HCC, cirrhosis                      |
| 21 | HCC, cirrhosis                      |
| 22 | HCC, pT3N0, cirrhosis               |
